# Supplementary material for: Evaluation of Body Composition, Physical Activity, and Food Intake in Patients with Inborn Errors of Intermediary Metabolism
Source: MDPI journal article supplement (doi:10.3390/nu13062111), 2021-06-20
Supplement: s1 [file s1]

**Table S1.** Mean body composition z-scores in patients and controls according to sex.

|                                    |     | Patients |           |    | Controls   |              |
|------------------------------------|-----|----------|-----------|----|------------|--------------|
| Anthropometric parameter (z-score) | Sex | N        | Mean ± SD | N  | Mean ± SD  | P            |
| Weight                             | F   | 57       | 0.33±1.09 | 50 | 0.44±0.76  | 0.534        |
|                                    | M   | 42       | 0.54±1.3  | 48 | 0.53±0.96  | 0.981        |
| Height                             | F   | 57       | -0.17±1.3 | 50 | 0.12±0.92  | 0.176        |
|                                    | M   | 42       | -0.42±1.2 | 48 | 0.18±0.98  | <b>0.008</b> |
| BMI                                | F   | 57       | 0.37±1.15 | 50 | 0.35±0.78  | 0.805        |
|                                    | M   | 42       | 0.81±1.5  | 48 | 0.48±1.01  | 0.164        |
| Mid-arm circumference              | F   | 57       | -0.37±1.2 | 50 | -0.4±1.02  | 0.884        |
|                                    | M   | 42       | -0.24±1.2 | 48 | -0.34±0.87 | 0.712        |
| Waist circumference                | F   | 57       | -0.12±1.4 | 50 | -0.56±1.2  | <b>0.041</b> |
|                                    | M   | 42       | -0.03±1.3 | 48 | -0.62±1.1  | <b>0.046</b> |
| Hip circumference                  | F   | 57       | -0.78±1.2 | 50 | -0.86±0.8  | 0.687        |
|                                    | M   | 42       | -0.49±1.2 | 48 | -0.78±0.96 | 0.231        |
| Biceps skinfold                    | F   | 57       | 0.57±1.7  | 50 | 0.55±1.3   | 0.957        |
|                                    | M   | 42       | 0.84±1.7  | 48 | 0.05±1.6   | <b>0.026</b> |
| Triceps skinfold                   | F   | 57       | -0.04±1.3 | 50 | 0.28±1.2   | 0.617        |
|                                    | M   | 42       | 0.23±1.2  | 48 | -0.22±1.3  | 0.094        |
| Subscapular skinfold               | F   | 57       | 0.83±2.3  | 50 | 0.82±1.6   | 0.975        |
|                                    | M   | 42       | 1.28±2.5  | 48 | 0.37±1.9   | 0.062        |
| Suprailiac skinfold                | F   | 57       | 1.34±1.9  | 50 | 1.5±1.6    | 0.679        |
|                                    | M   | 42       | 1.4±1.7   | 48 | 0.54±1.6   | <b>0.021</b> |

F, females, M, males, BMI, body mass index, IEIM, inborn errors of intermediary metabolism. Differences considered significant at  $p < 0.05$ .

**Table S2.** Mean dietary intake per day in patients and controls.

|                        | Patients       | Controls       |              |
|------------------------|----------------|----------------|--------------|
| Dietary intake/day     | Mean ± SD      | Mean ± SD      | P            |
| Protein, total (g)     | 55.75±21.23    | 75.67±14.61    | <b>0.000</b> |
| Energy, protein (Kcal) | 216.19±83.63   | 302.59±58.57   | <b>0.000</b> |
| Energy, protein %      | 13.95±4.65     | 20.06±3.77     | <b>0.000</b> |
| Fat, total (g)         | 47.96±20.21    | 47.73±10.86    | 0.802        |
| Energy, fat (Kcal)     | 418.37±158.69  | 430.40±97.42   | 0.628        |
| Energy, fat %          | 26.91±7.43     | 28.08±5.22     | 0.290        |
| CH, total (g)          | 234.57±119.76  | 201.79±39.26   | <b>0.013</b> |
| Energy, CH (Kcal)      | 893.84±265.69  | 808.76±157.07  | <b>0.008</b> |
| Energy, CH %           | 88.34±5.68     | 52.46±5.81     | 0.093        |
| Energy, total (Kcal)   | 1566.93±399.72 | 1540.83±224.77 | 0.487        |
| Energy (Kcal/kg)       | 40.99±17.06    | 43.09±19.49    | 0.489        |
| Protein, total (g/kg)  | 1.41±0.65      | 2.08±0.89      | <b>0.000</b> |
| Cholesterol (mg)       | 172.97±104.99  | 179.86±102.62  | 0.647        |
| Sodium (mg)            | 1111.54±346.58 | 1397.71±593.01 | <b>0.000</b> |
| Potassium (mg)         | 1814.71±503.78 | 1782.63±598.12 | 0.688        |

|                  |               |               |              |
|------------------|---------------|---------------|--------------|
| Calcium (mg)     | 717.46±231.69 | 673.46±325.80 | 0.284        |
| Magnesium (mg)   | 190.26±74.40  | 182.71±86.32  | 0.517        |
| Phosphorus (mg)  | 879.07±273.92 | 874.15±323.69 | 0.117        |
| Iron (mg)        | 11.84±7.22    | 10.17±7.35    | 0.910        |
| Fluor (µg)       | 10.96±23.01   | 5.21±14.56    | <b>0.042</b> |
| Selenium (µg)    | 64.57±29.67   | 66.91±34.97   | 0.617        |
| Zinc (mg)        | 7.18±3.42     | 6.88±3.57     | 0.557        |
| Folate (µg)      | 283.30±155.27 | 226.13±165.30 | <b>0.015</b> |
| Vitamin B12 (µg) | 5.91±6.78     | 6.61±15.41    | 0.685        |
| Vitamin A (µg)   | 527.28±296.93 | 440.7±301.52  | <b>0.047</b> |
| Vitamin D (µg)   | 1.49±0.82     | 1.56±1.23     | 0.624        |
| Vitamin K (mg)   | 71.66±63.73   | 75.77±94.87   | 0.724        |
| Vitamin E (mg)   | 4.51±3.52     | 4.16±3.47     | 0.491        |

CH, carbohydrate. Differences considered significant at  $p<0.05$ .

**Table S3.** Mean values in biochemical blood analysis in IEIM patients and controls.

| Blood variable        | Patients       | Controls      | <i>P</i>     |
|-----------------------|----------------|---------------|--------------|
|                       | Mean± SD       | Mean± SD      |              |
| Prealbumin (mg/dL)    | 22.98±5.59     | 22.66±4.56    | 0.667        |
| RBP (mg/dL)           | 3.51±0.97      | 3.72±2.35     | 0.421        |
| Protein, total (g/dL) | 7.27±0.35      | 7.21±0.37     | 0.283        |
| Albumin (g/dL)        | 4.64±0.214     | 4.69±0.207    | 0.798        |
| Calcium (mg/dL)       | 9.77±0.33      | 9.76±0.29     | 0.771        |
| Zinc (µg/dl)          | 101.69±17.63   | 103.3±12.44   | 0.468        |
| Selenium (µg/L)       | 76.37±18.01    | 85.46±8.01    | <b>0.000</b> |
| Iron (µg/dL)          | 89.8±33.19     | 89.55±34.81   | 0.967        |
| Ferritin (ng/mL)      | 38.01±27.64    | 40.48±38.93   | 0.620        |
| Transferrin (mg/dL)   | 291.08±43.01   | 264.34±46.96  | 0.685        |
| Vitamin A (mg/dL)     | 0.39±0.14      | 0.36±0.11     | 0.325        |
| Vitamin D (ng/mL)     | 23.86±11.58    | 22.33±6.8     | 0.272        |
| Vitamin E (mg/dL)     | 1.69±2.01      | 4.38±4.81     | <b>0.003</b> |
| Vitamin k (ng/dL)     | 0.91±1.45      | 0.32±0.26     | <b>0.003</b> |
| Folate (ng/mL)        | 17.82±11.41    | 8.99±3.79     | <b>0.000</b> |
| Vitamin B12 (pg/mL)   | 1621.4±8030.14 | 577.95±221.79 | <b>0.046</b> |
| Cholesterol (mg/dL)   | 157.86±26.44   | 165.6±27.12   | <b>0.047</b> |
| TG (mg/dL)            | 84.2±43.39     | 59.77±27.57   | <b>0.000</b> |
| HDL (mg/dL)           | 56.92±51.51    | 57.71±11.55   | 0.888        |
| LDL (mg/dL)           | 87.78±19.65    | 107.88±110.95 | 0.126        |

HDL, high density lipoprotein, LDL, low density lipoprotein, RBP, retinol binding protein, TG, triglyceride. Differences considered significant at  $p<0.05$ .
